# Supplementary material for: Multi-Scale Remote Sensing Assessment of Ecological Environment Quality and Its Driving Factors in Watersheds: A Case Study of Huashan Creek Watershed in China
Source: MDPI journal article supplement (doi:10.3390/rs15245633), 2023-12-05

**Figure S1.** Characteristics of the spatial response to RESI drivers at typical scales.

(A) 240 grid scale;

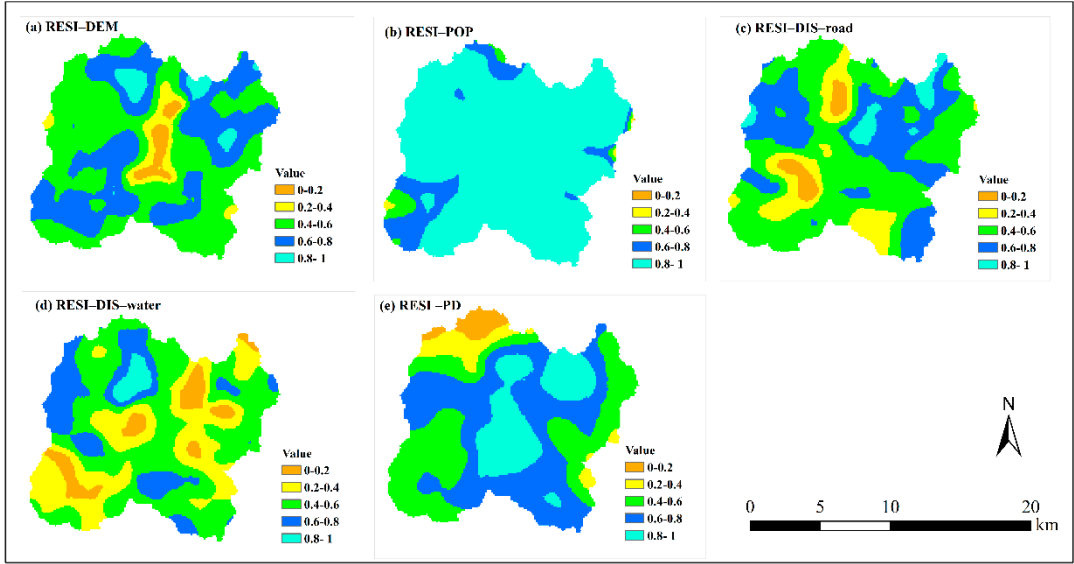

(B) village scale;

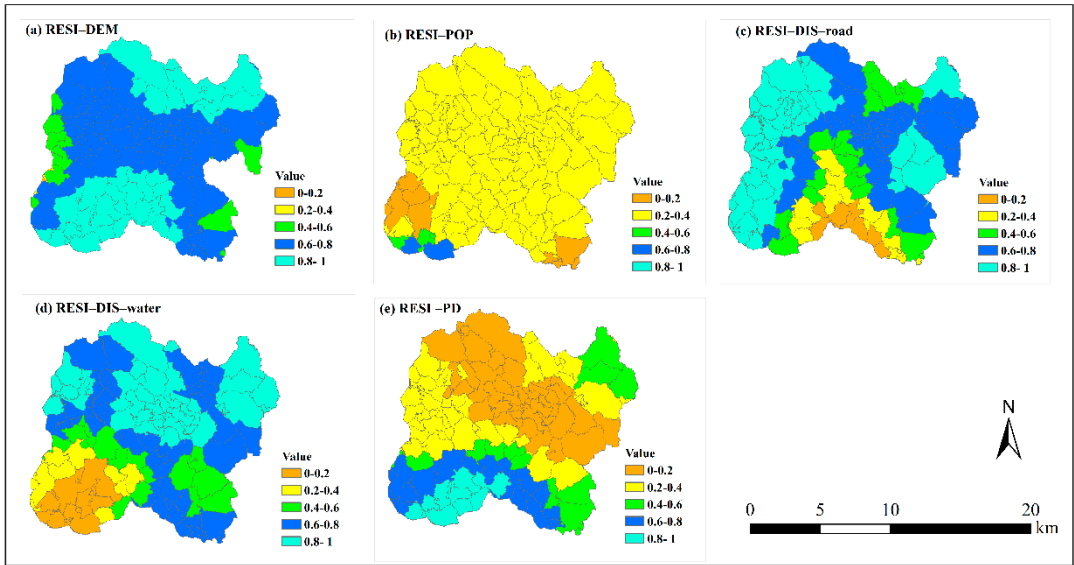

(C) watershed scale.

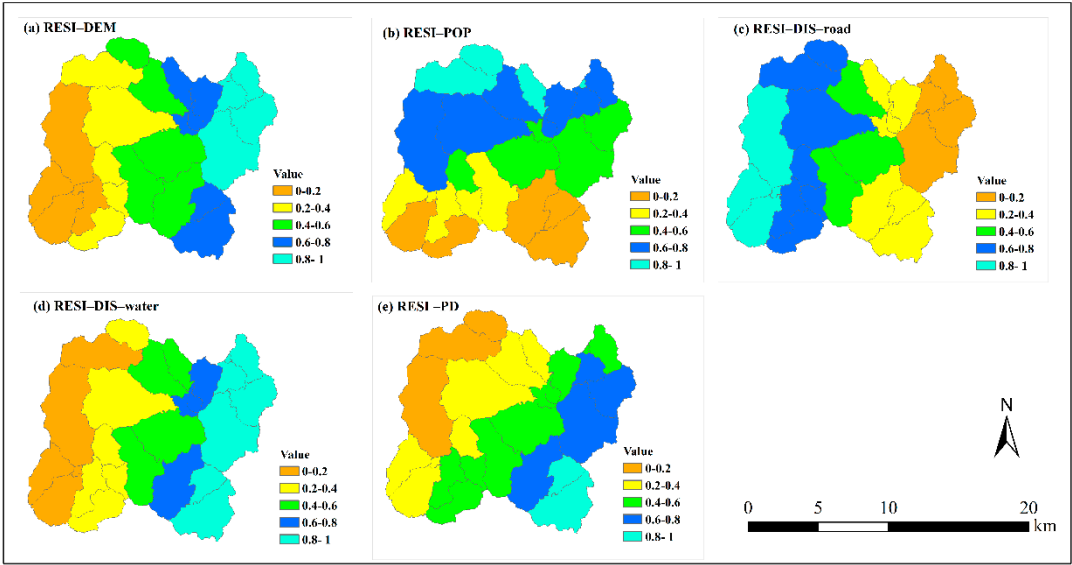

Supplement: s1 [file s1]
